# Supplementary material for: Switchable disposable passive RFID vapour sensors from inkjet printed electronic components integrated with PDMS as a stimulus responsive material
Source: Royal Society of Chemistry journal article supplement (doi:10.1039/c6tc05509e), 2017-01-01
Supplement: c6tc05509e1.pdf [file c6tc05509e1.pdf]

## Supporting Information

### **Switchable Disposable Passive RFID Vapour Sensors from Inkjet Printed Electronic Components Integrated with PDMS as a Stimulus Responsive Material**

*Kate E. Belsey, Adam V.S. Parry, Christina V. Rumens, Mohamed A. Ziai, Stephen G. Yeates\*, John C. Batchelor\* and Simon J. Holder\**

#### Further RFID tag design considerations

As dipole antennas are significantly detuned when they are mounted on, or very close, to dielectric or conducting surfaces, the RFID tag performance is often compromised when attached to objects. To overcome this serious limitation, the tag antenna shown in Figure 1 has a wide bandwidth performance such that it radiates efficiently over a significant degree of detuning. The reported design is 87 % efficient when experiencing a frequency detune of 40 MHz and this adequately covers the frequency change expected when the tag is attached to a dielectric surface. The sensing impedance transducer in this design comprises the oval loop (feed loop) in Figure 1. The feed loop acts as a high frequency impedance transformer which converts the antenna impedance to the RFID chip impedance. These impedances are both complex quantities comprising real resistive parts, which should be equal, and imaginary reactive parts, which should be equal in magnitude and opposite in phase. This condition is referred to as the ‘conjugate match’ and results in maximum power transfer between the antenna and the RFID IC. The maximum power transfer condition for smallest turn-on power is established through the physical dimensions of the feed loop, the conductance of the feed loop track, and the dielectric properties of the material substrate on which it is mounted.

#### *Optimization of printing silver inks onto PDMS*

**Table SI1.** Contact angles and surface energy measurements for PDMS

|                  |      |          |                                  |
|------------------|------|----------|----------------------------------|
| H <sub>2</sub> O | DMSO | Ethylene | Surface Energy mNm <sup>-1</sup> |
|------------------|------|----------|----------------------------------|

|                   |                  |                  |            |                |                |
|-------------------|------------------|------------------|------------|----------------|----------------|
|                   |                  | Glycol           |            |                |                |
| $111 \pm 3^\circ$ | $82 \pm 1^\circ$ | $93 \pm 1^\circ$ | EOS        | Fowkes         | OWRK           |
|                   |                  |                  | $16 \pm 1$ | $14.7 \pm 0.9$ | $14.0 \pm 0.2$ |

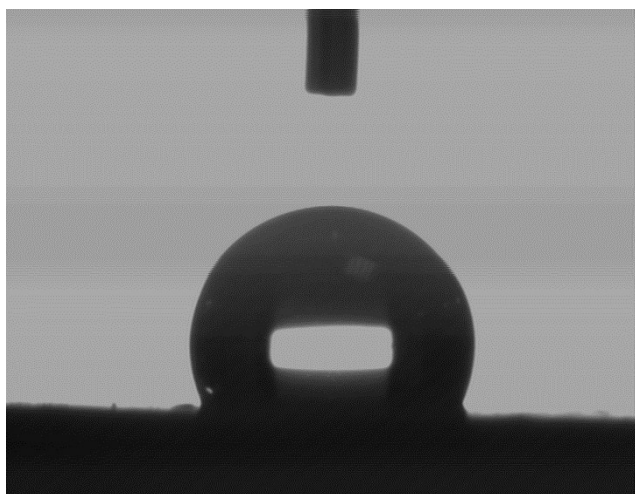

**Figure SI1.** Water droplet on PDMS, showing a contact angle of approximately  $110^\circ$ .

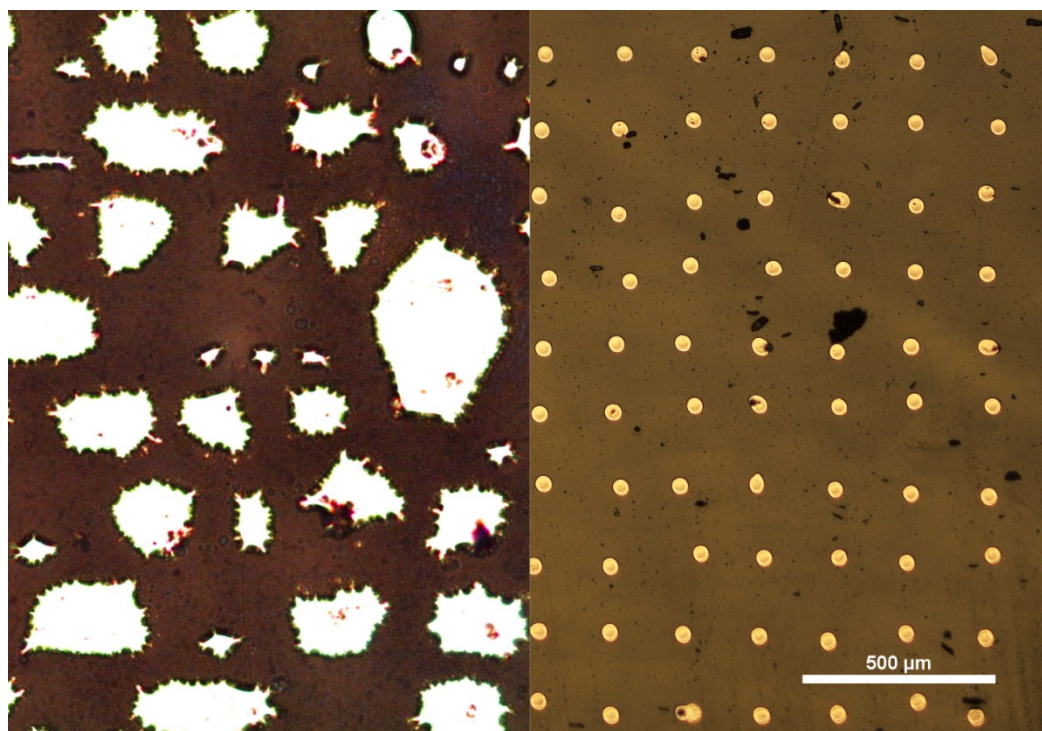

**Figure SI2.** Droplets of silver on untreated (left) and UV-Ozone treated (right) PDMS substrates.

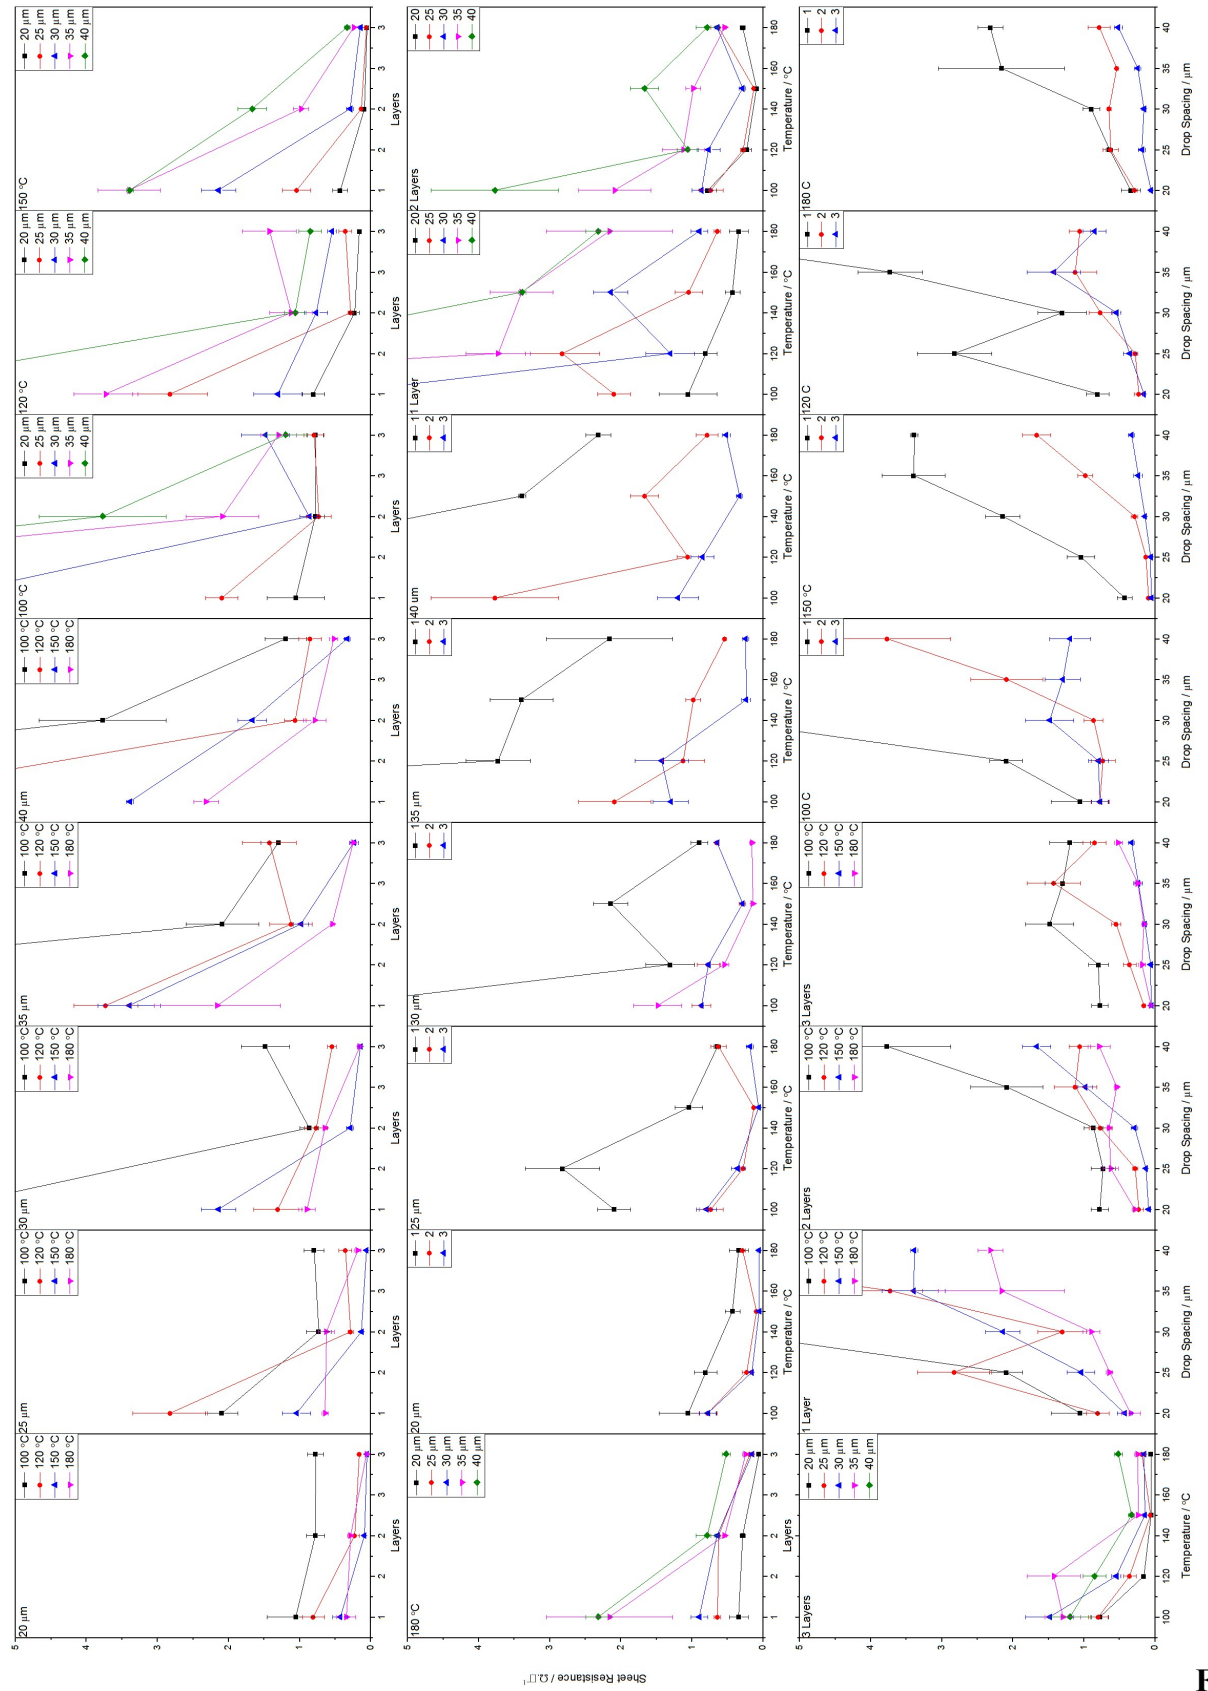

figure SI3. Full data set of sheet resistance optimization.

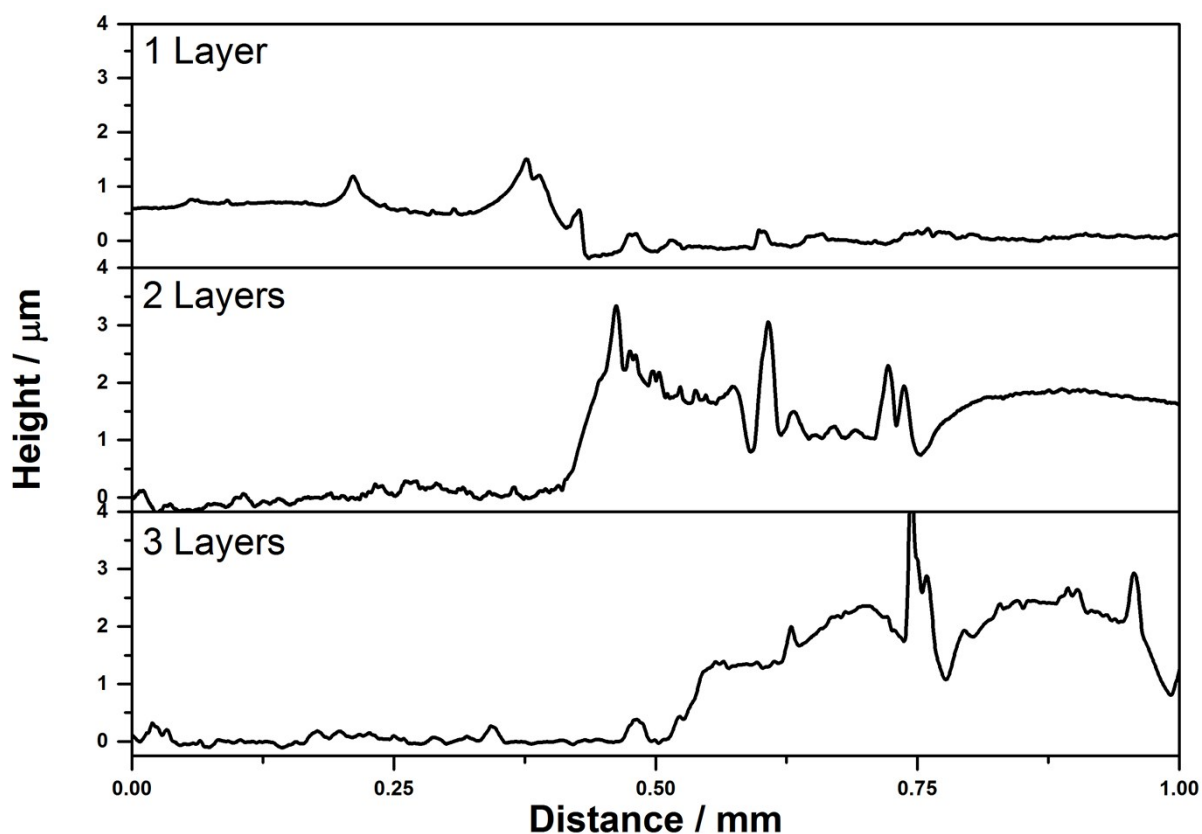

**Figure SI4.** Height profile for silver on PDMS, average heights are; 1 layer = 670 nm, 2 layers = 1420 nm and 3 layers = 2000 nm.

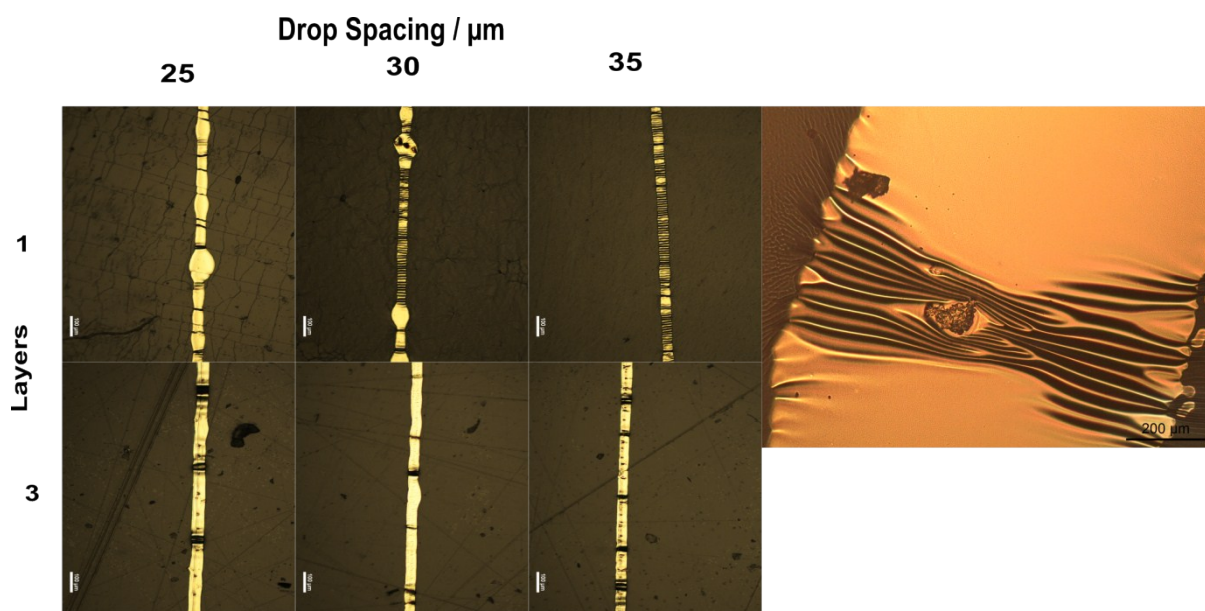

**Figure SI5.** Influence of drop spacing on line quality for silver ink printed on UV-Ozone treated PDMS. Far right image shows a magnified image of a feed loop after sintering demonstrating the buckling from thermal expansion and contraction.

**Table SI2:** Resistance measurements of first batch of printed loops to test different number of passes and different sintering lengths. (All printed on rough side of PDMS, sintering at 100°C)

| APB225 # | Passes | Sinter Time | Resistance / $\Omega$ Manchester |       | Resistance / $\Omega$ Kent |
|----------|--------|-------------|----------------------------------|-------|----------------------------|
|          |        |             | Before                           | After |                            |
| 1        | 1 pass | 15 mins     | 170                              | 105   | 109                        |
| 2        |        |             | 180                              | 180   | 159                        |
| 3        |        |             | 230                              | 180   | 181                        |
| 4        |        | 16 Hours    | 250                              | 150   | 133                        |
| 5        |        |             | 500                              | 530   | 650                        |
| 6        |        |             | 430                              | 310   | 500                        |
| 7        | 2 pass | 15 mins     | X                                | X     | 335                        |
| 8        |        |             | 250                              | 110   | 167                        |
| 9        |        |             | 8000                             | 650   | 520                        |
| 10       |        | 16 hours    | 4000                             | 820   | 5500                       |
| 11       |        |             | 1000000                          | 600   | 2200                       |
| 12       |        |             | 600                              | 250   | 1500                       |
| 13       | 3 pass | 15 Mins     | 30                               | 40    | 38                         |
| 14       |        |             | 30                               | 60    | 42                         |
| 15       |        |             | 40                               | 1500  | X                          |
| 16       |        | 16 hours    | 30                               | X     | 360                        |
| 17       |        |             | 30                               | 250   | X                          |
| 18       |        |             | 30                               | 600   | 770                        |

**Table SI3:** Resistance measurements of second batch of printed loops to test different sintering conditions. (All printed on rough side of PDMS, all 3 passes of silver ink)

| APB227 # | Sinter Conditions         | Resistance / $\Omega$ Manchester |       | Resistance / $\Omega$ Kent |
|----------|---------------------------|----------------------------------|-------|----------------------------|
|          |                           | Before                           | After |                            |
| 2        | None                      | 20000                            |       | X                          |
| 5        | None                      | X                                |       | X                          |
| 9        | None                      | 35                               |       | X                          |
| 10       | None                      | 40                               |       | 700                        |
| 11       | None                      | 2000                             |       | X                          |
| 12       | None                      | 35                               |       | 4K                         |
| 13       | None                      | 44000                            |       | X                          |
| 14       | None                      | X                                |       | x                          |
| 16       | None                      | 1000                             |       | X                          |
| 17       | None                      | X                                |       | X                          |
| 1        | 60°C Hot Plate - 14 hours | 45                               | X     | X                          |
| 3        | 60°C Hot Plate - 14 hours | 65                               | X     | X                          |
| 4        | 60°C Hot Plate - 14 hours | 80                               | 120   | 28M                        |
| 6        | 150°C – 2 hours           | 30                               | 40    | 37.2                       |
| 7        | 150°C – 2 hours           | 40                               | 50    | 34.5                       |
| 8        | 150°C – 2 hours           | 100                              | 100   | 44                         |
| 15       | 150°C – 0.5 hour          | 60                               | 100   | 140                        |
| 18       | 150°C – 0.5 hour          | 40                               | 150   | 9M                         |

**Table SI4:** Resistance measurements of third batch of printed loops to test smooth side vs rough and the effect of sintering.

| APB229 # | Smooth/Rough | ~passes | Sinter Conditions | Resistance / $\Omega$ |       |
|----------|--------------|---------|-------------------|-----------------------|-------|
|          |              |         |                   | Before                | After |
| 1        | Smooth       | 1       | None              | 600                   |       |
| 2        | Smooth       | 2       | None              | 62                    |       |
| 4        | Smooth       | 3       | None              | x                     |       |
| 5        | Smooth       | 3       | None              | 4000                  |       |
| 6        | Smooth       | 3       | None              | 2000                  |       |
| 8        | Smooth       | 3       | None              | 700                   |       |
| 10       | Smooth       | 3       | None              | 25                    |       |
| 14       | Smooth       | 3       | None              | x                     |       |
| 3        | Smooth       | 3       | 150°C 1hour       | 55                    | 50    |
| 7        | Smooth       | 3       | 150°C 1hour       | 40                    | 15    |
| 9        | Smooth       | 3       | 150°C 1hour       | 25                    | 36    |
| 11       | Smooth       | 3       | 150°C 1hour       | 19                    | 7     |
| 12       | Smooth       | 3       | 150°C 1hour       | 75                    | 13    |
| 13       | Smooth       | 3       | 150°C 1hour       | 157                   | 9     |
| 15       | Rough        | 3       | 150°C 1hour       | 36                    | 25    |
| 16       | Rough        | 3       | 150°C 1hour       | 35                    | 41    |
| 17       | Rough        | 3       | 150°C 1hour       | 28                    | 25    |
| 18       | Rough        | 3       | 150°C 1hour       | 42                    | 255   |
| 19       | Rough        | 3       | 150°C 1hour       | 39                    | 17    |
| 20       | Rough        | 3       | 150°C 1hour       | 28                    | 17    |

**Table SI5:** Resistance measurements of fourth batch of printed loops to test optimized conditions. (All printed on smooth side of PDMS, all 3 passes of silver ink, all sintered at 150°C for 1 hour).

| APB229 X # | Resistance / $\Omega$ | APB229X # | Resistance / $\Omega$ |
|------------|-----------------------|-----------|-----------------------|
| 1          | 29.2                  | 13        | 10.9                  |
| 2          | 12.2                  | 14        | 9.9                   |
| 3          | X                     | 15        | 16.4                  |
| 4          | 10.2                  | 16        | 10.6                  |
| 5          | 10.8                  | 17        | 12.1                  |
| 6          | 13                    | 18        | 34.2                  |
| 7          | 12.7                  | 19        | 19.2                  |
| 8          | 11.7                  | 20        | 10.8                  |
| 9          | 10.5                  | 21        | 9.3                   |
| 10         | 10.5                  | 22        | 18                    |
| 11         | 13.7                  | 23        | 70                    |
| 12         | 22.3                  | 24        | 11.7                  |



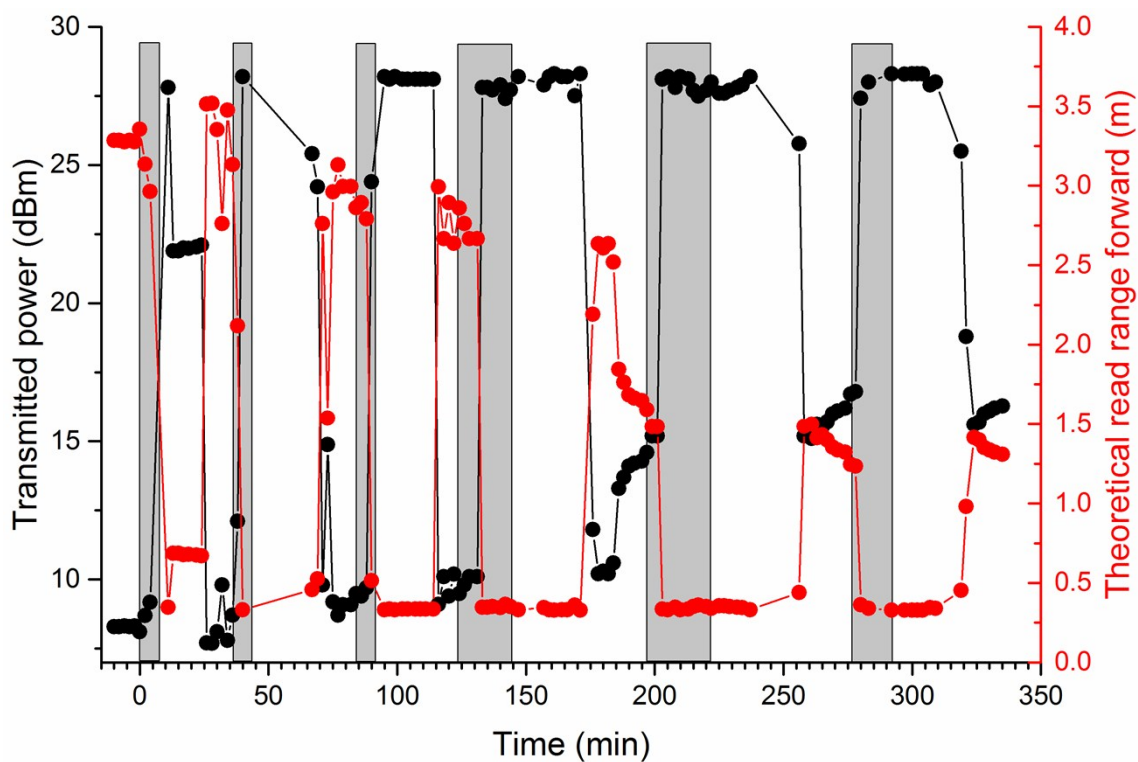

**Figure SI6:** Transmitted power and theoretical read range for 6 cycles of solvent vapor exposure in DCM.

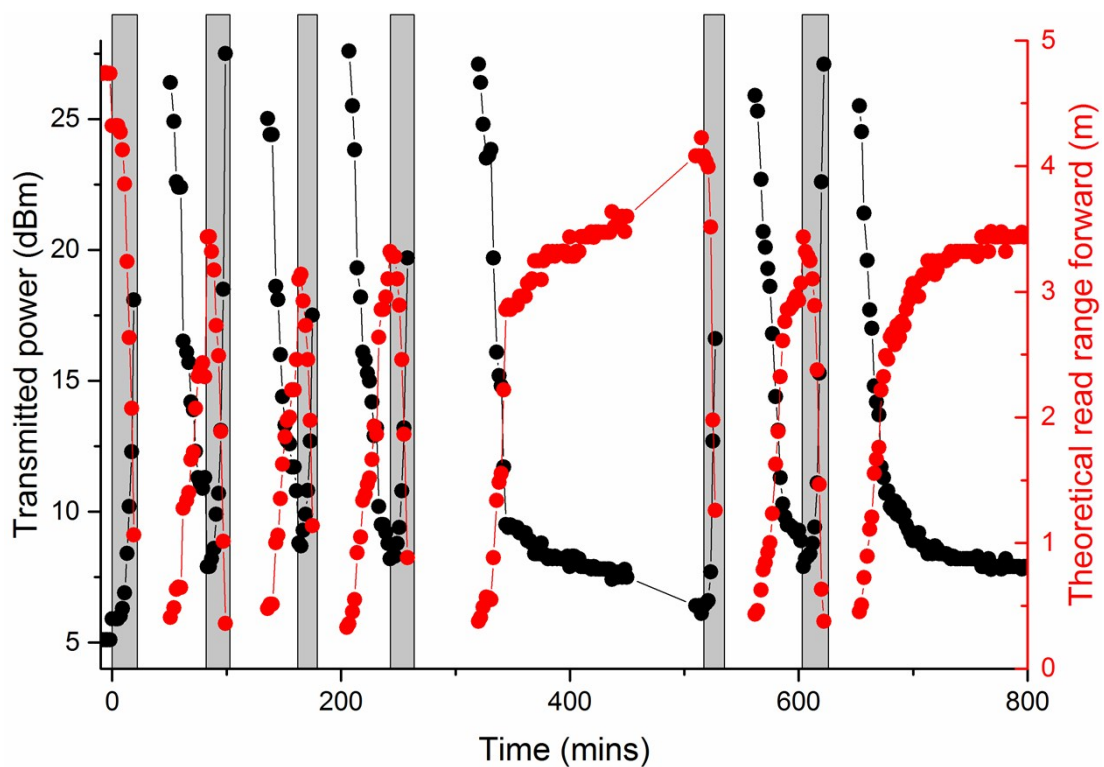

**Figure SI7:** Transmitted power and theoretical read range for 6 cycles of solvent vapor exposure in ethyl acetate.

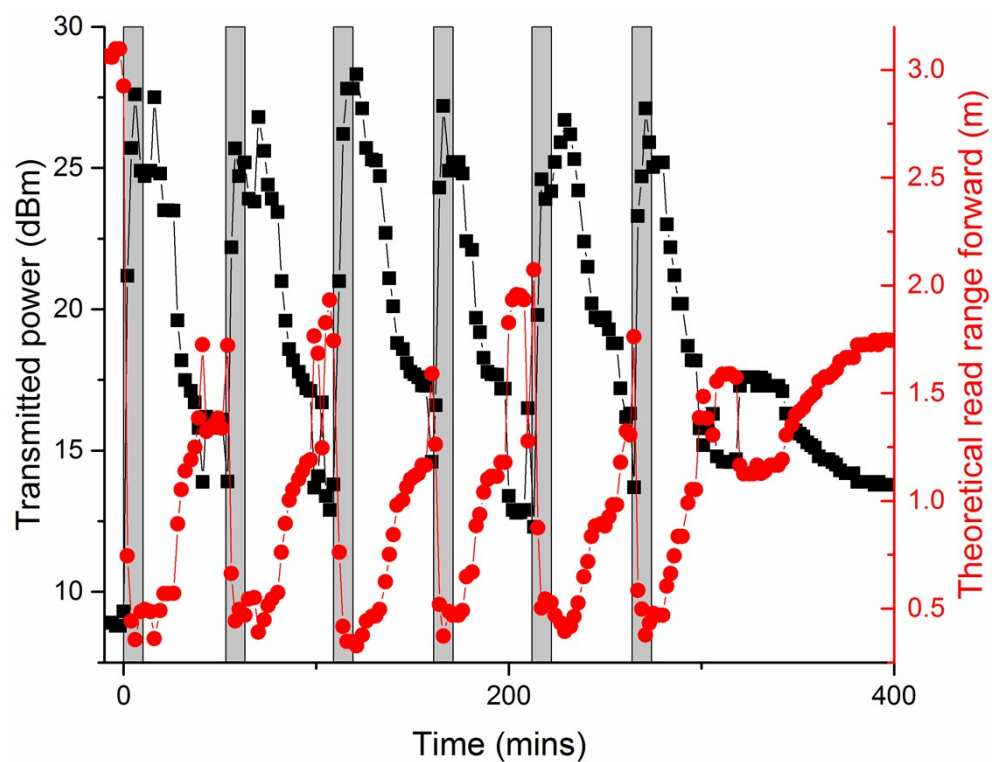

**Figure SI8:** Transmitted power and theoretical read range for 6 cycles of solvent vapor exposure in acetaldehyde.

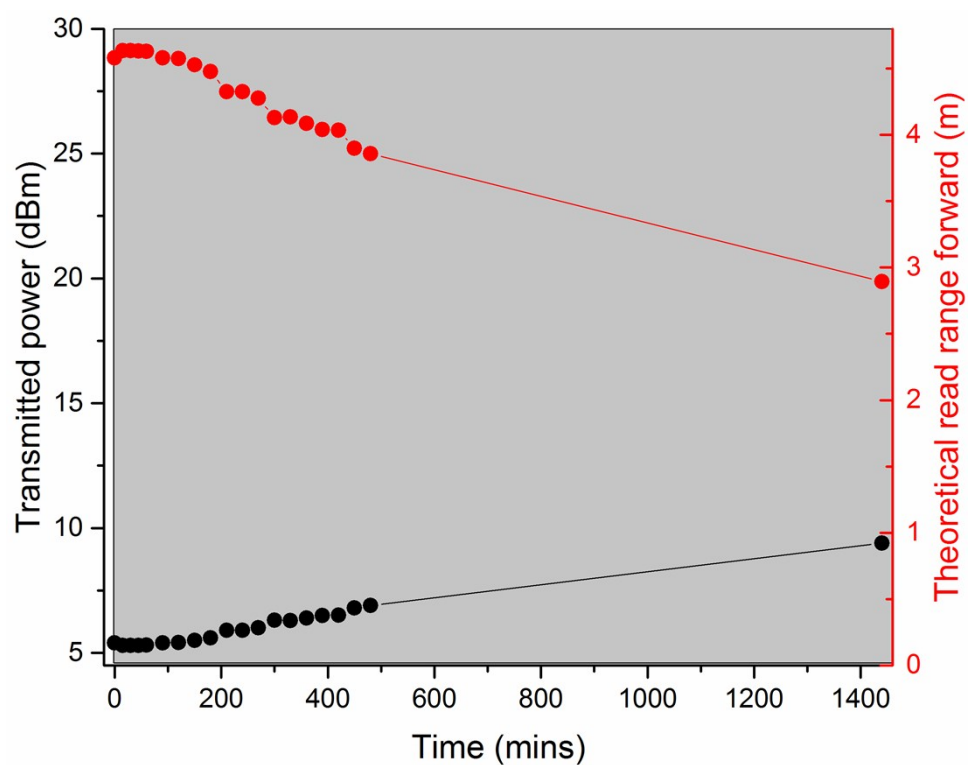

**Figure SI9:** Transmitted power and theoretical read range for 6 cycles of solvent vapor exposure in xylene.



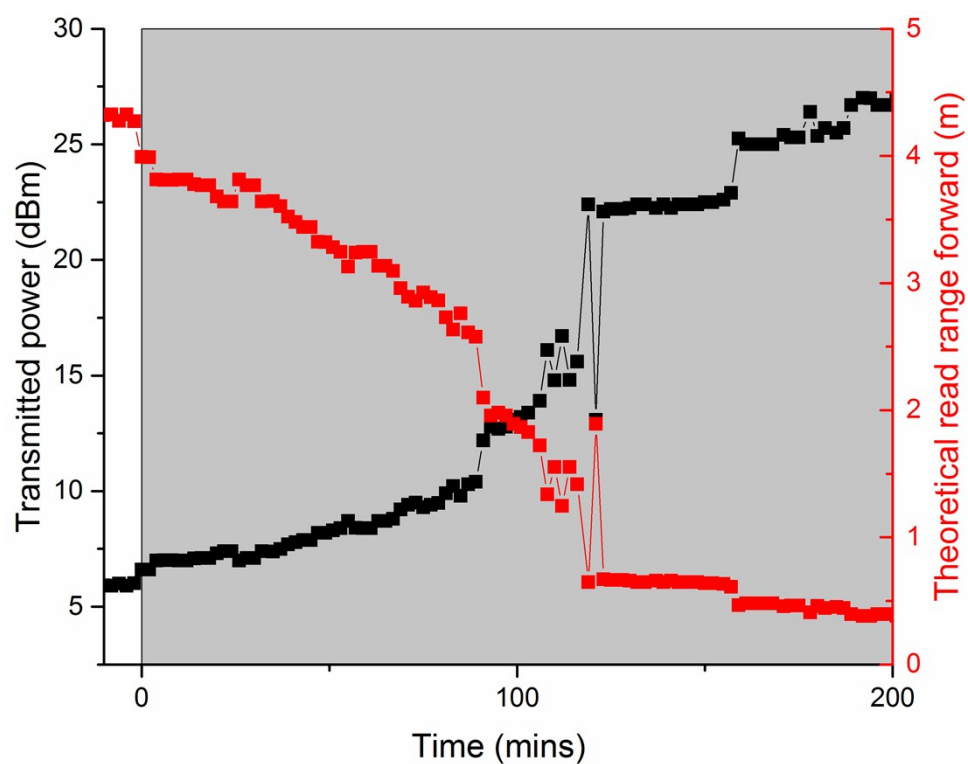

**Figure SI10:** Transmitted power and theoretical read range for 6 cycles of solvent vapor exposure in propan-2-ol.

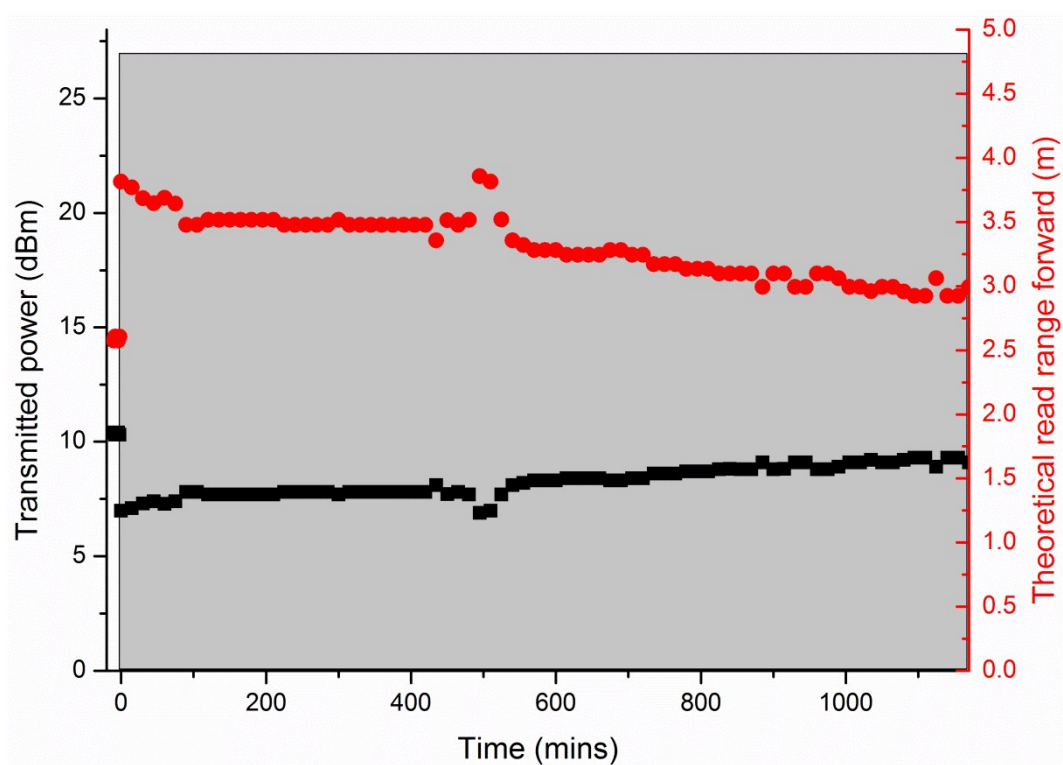

**Figure SI11:** Transmitted power and theoretical read range for 6 cycles of solvent vapor exposure in acetic acid.

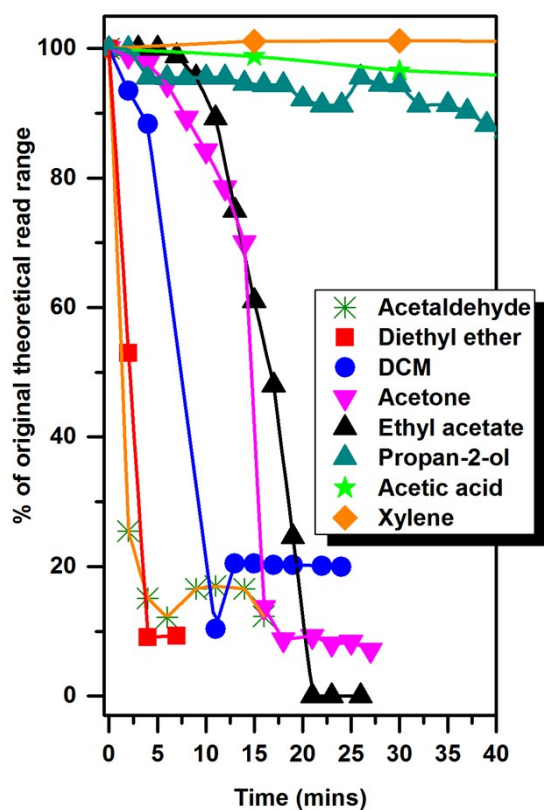

**Figure SI12:** Normalized change in read range of RFID tags on exposure to each solvent vapor.

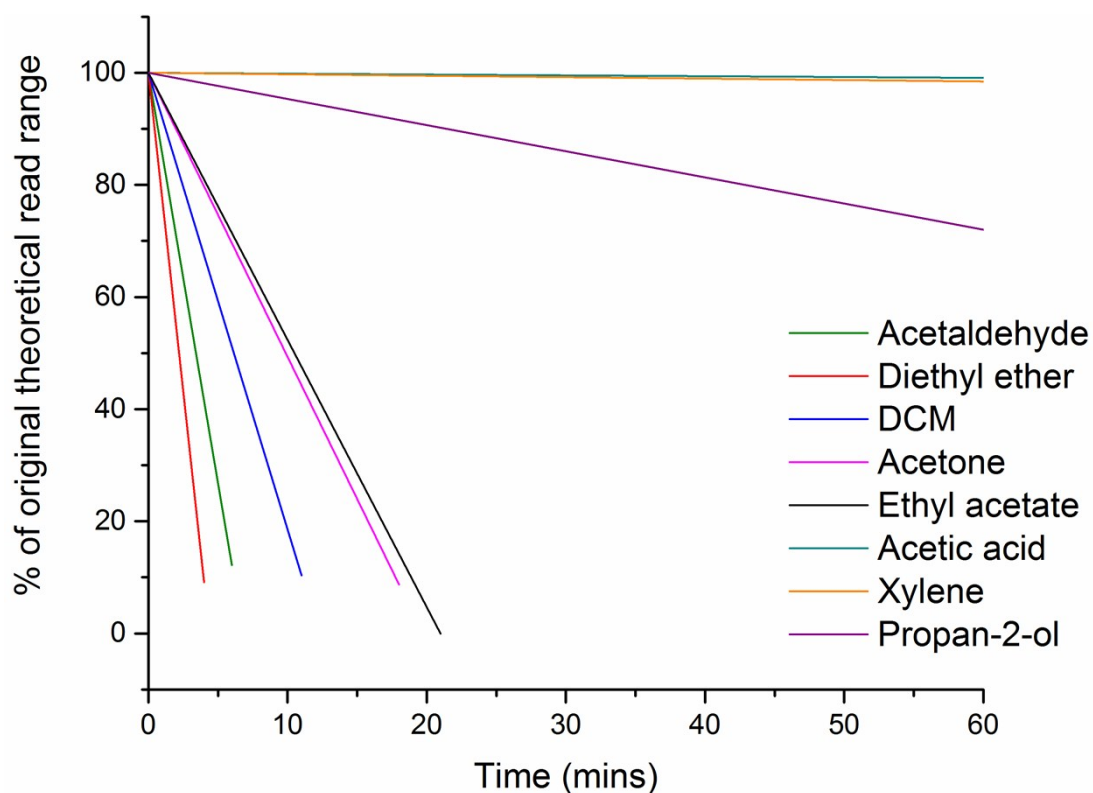

**Figure SI13:** Plot of time for each RFID tag to reach minimum read range in various solvent vapors.

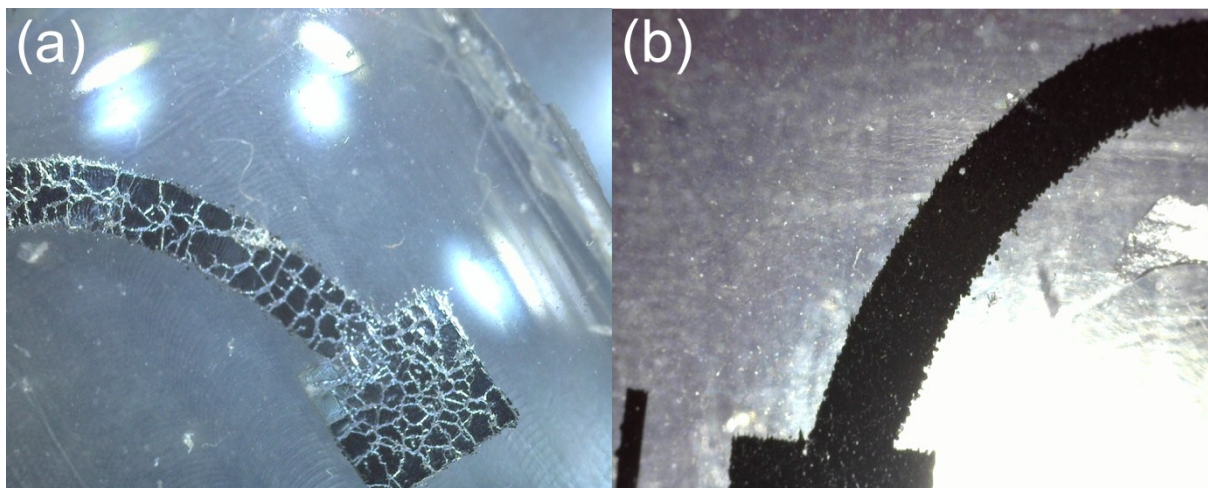

**Figure SI14:** Microscope images of printed silver loops: (a) a loop after exposure to diethyl ether vapor for 20 minutes; and (b) a loop which has been through complete cycles and has then been left in air for more than an hour.

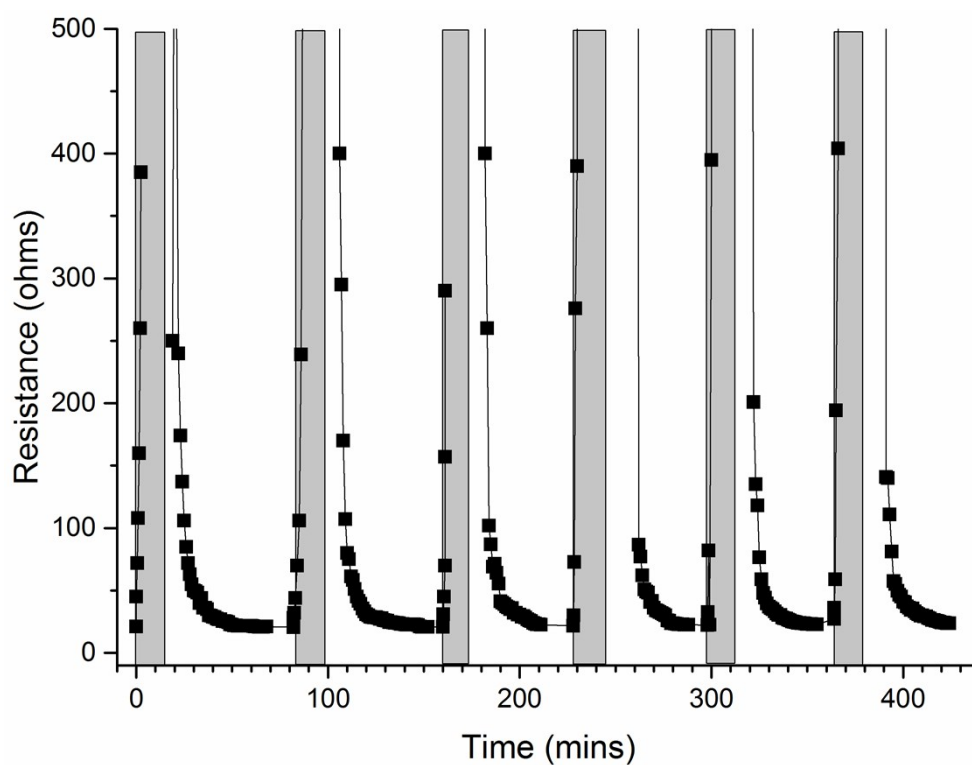

**Figure SI15:** Resistance measurements for 6 cycles of solvent vapor exposure in diethyl ether.

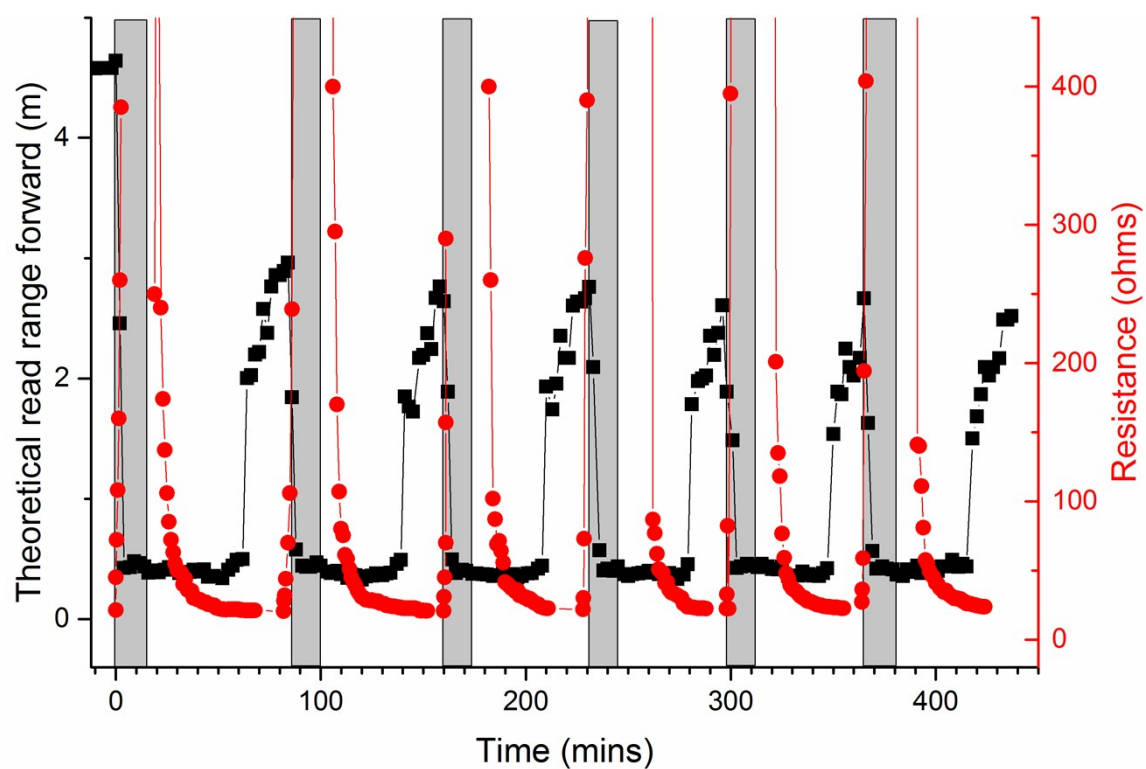

**Figure SI16:** Resistance and read range measurements for 6 cycles of solvent vapor exposure in diethyl ether.
